# Supplementary material
Source: PubMed Central journal article supplement (PMC6047345)
Supplement: NIHMS895894-supplement-1.pdf [file NIHMS895894-supplement-1.pdf]

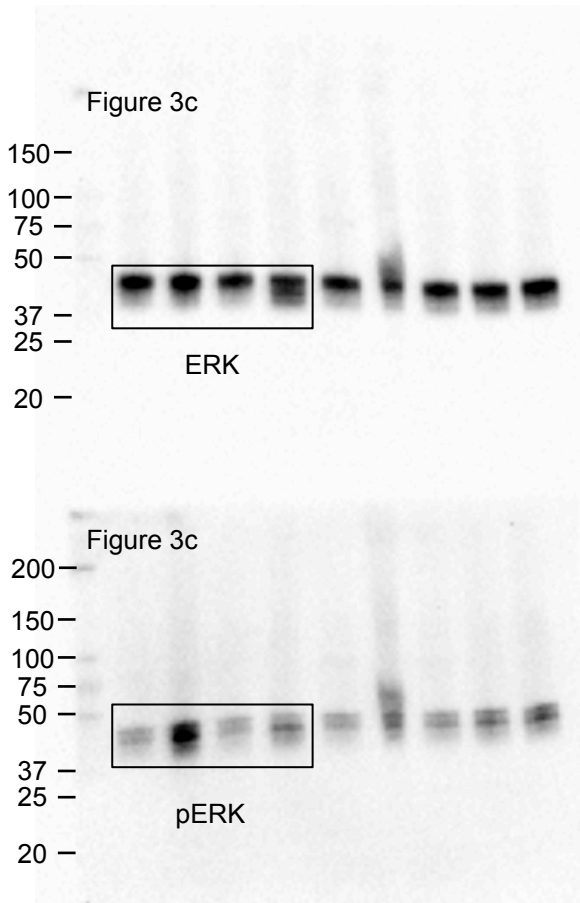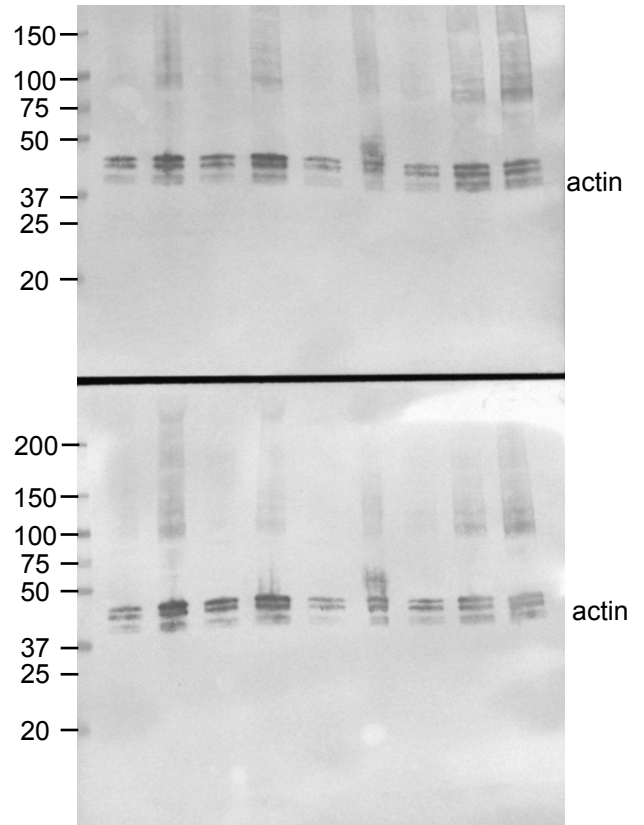

Supplemental Figure 1 Gel source data

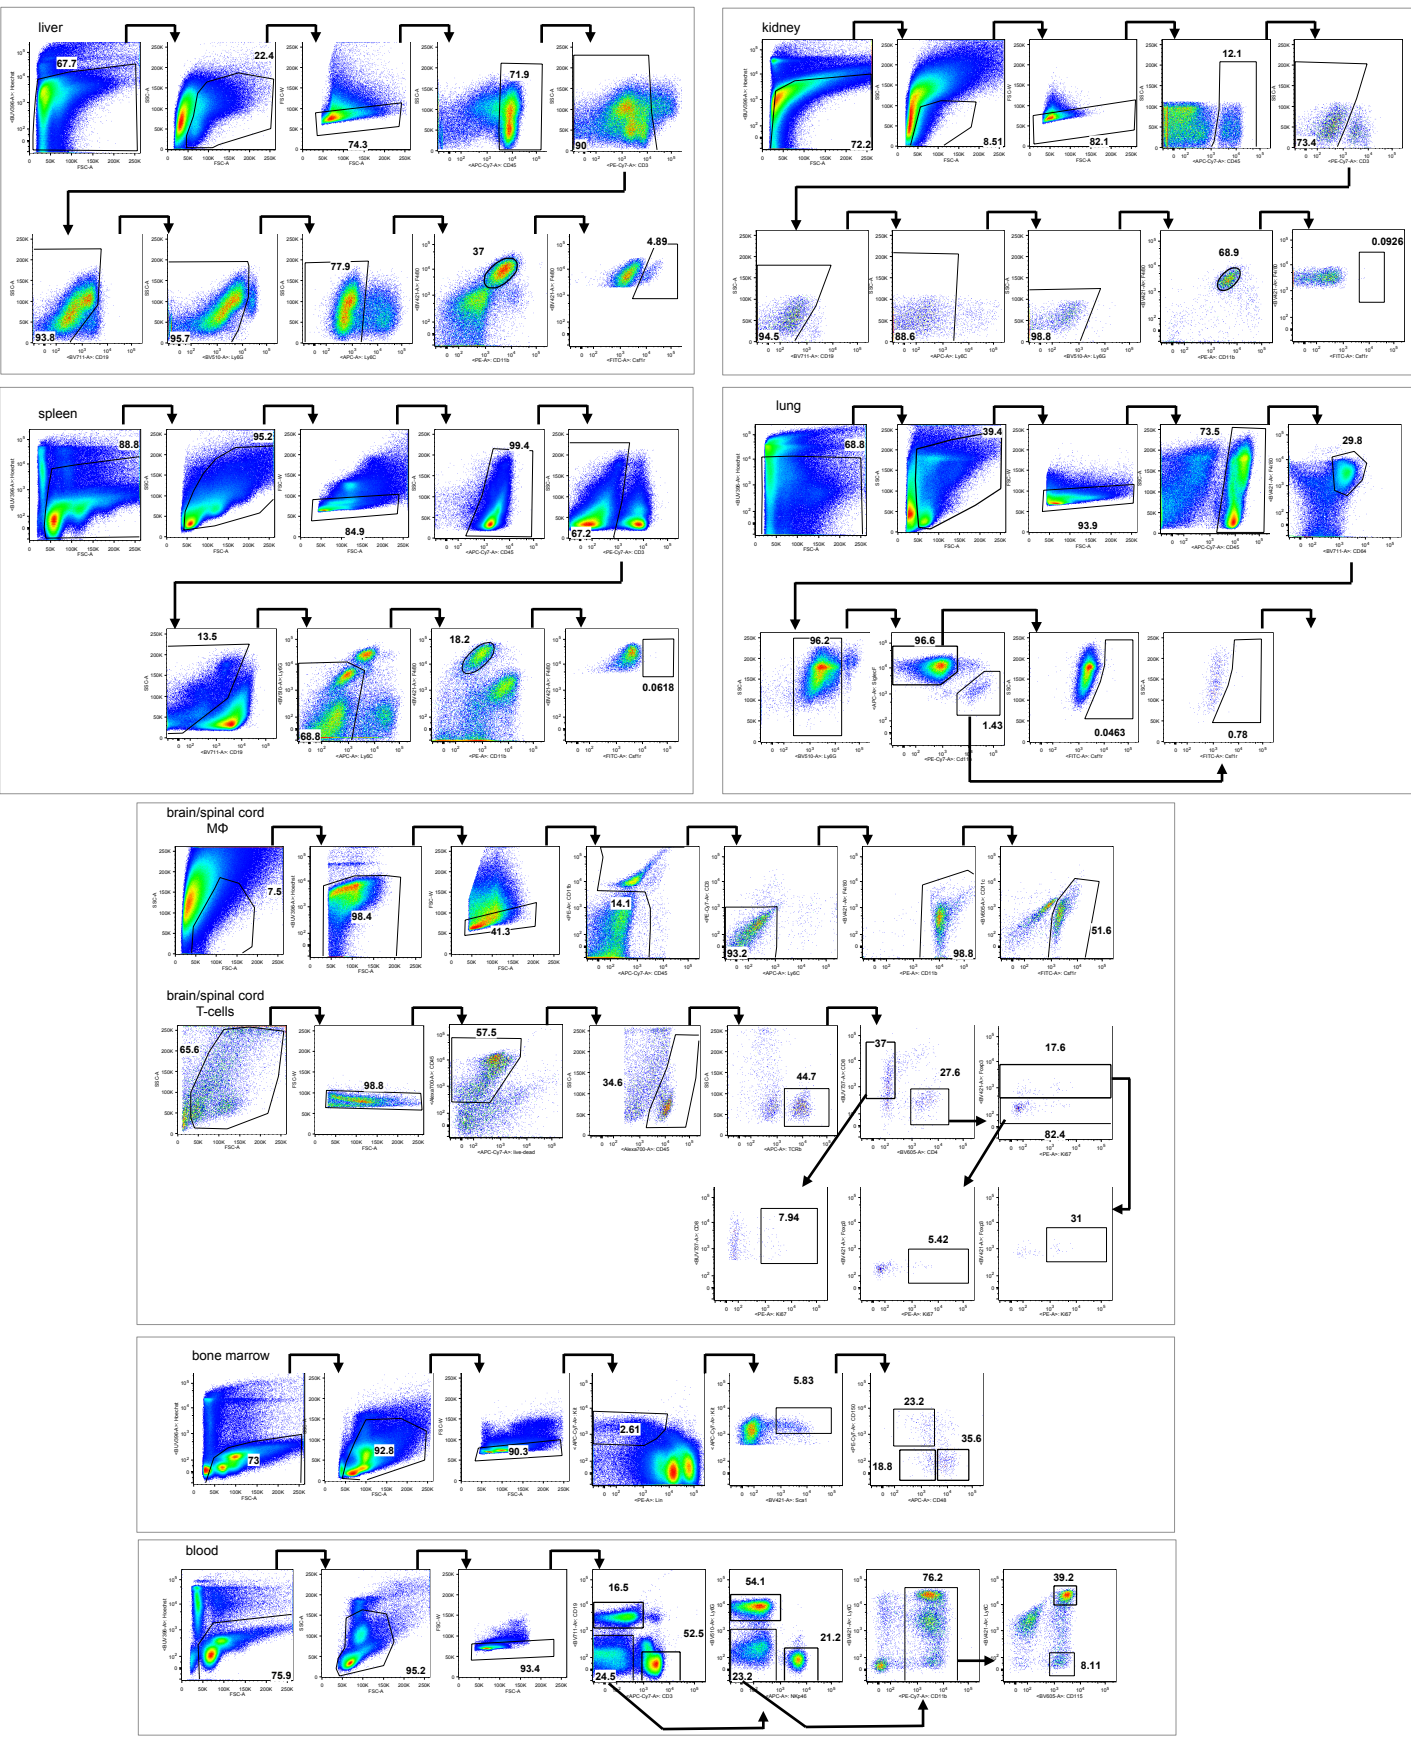

Supplemental Figure 2 Gating strategy for different tissues and cell types.
